# Supplementary material for: African Anthropogenic Emissions Inventory for gases and particlesfrom 1990 to 2015
Source: Copernicus journal article supplement (doi:10.5194/essd-2020-328), 2020-11-23
Supplement: Supplementary file [file essd-2020-328-AC2-supplement.pdf]

# **Review of “African Anthropogenic Emissions Inventory for gases and particles from 1990 to 2015” by S. Keita et al. submitted to ESSD in 2020**

By Keita et al.

## **Response to Reviewer’s comments**

Dear Editor,

First, we would like to thank the reviewers for their positive comments and their suggestions to improve the quality of this document. All the questions were treated and our document was fully revised taking into account all the reviewers’ comments. The paper, figures and tables were modified as a result of the different suggestions and remarks.

We have indicated the referees’ comments in black and the authors' responses [in blue](#).

### **Reviewer’s comments**

#### **Referee #2**

##### **Anonymous Referee #2**

Received and published: 12 March 2021

In this paper the authors provide a very valuable emission inventory for a region for which very little information is available with regard to anthropogenic emissions. This is a well-written and original paper that I must be accepted for publication in a journal such as ESSD. There are, however, a number of typographical errors throughout the paper, which must be addressed by the authors. This can be rectified through subjecting the paper for language editing by a English language editor, as well as assistance with text editing by a native English speaker with a background in atmospheric science.

[We thank Referee #2 for providing very useful comments and suggestions on the manuscript. Following the referee' comments, typographical errors have been corrected throughout the document and proofreading has been carried out with the help of a native English speaker with a background in atmospheric science as suggested by the referee. Many changes were made in the manuscript, and have been taken into account following the referee’s comments.](#)
